# Supplementary material
Source: ML conference proceedings conference paper supplement (https://openreview.net/forum?id=5-2mX9_U5i)
Supplement: supplementary_material [file attachment]

## A PROOF OF RESULTS IN SECTION 3

### A.1 PROOF OF THEOREM 3.3 (GLOBAL INTEGRATION ERROR, INFINITE TIME VERSION)

*Proof.* We write the solution of an SDE by  $\mathbf{x}_{t_0, \mathbf{x}_{t_0}}(t_0 + t)$  when the dependence on initialization needs highlight. Denote  $t_k = kh$  and  $\mathbf{x}_{t_k} = \mathbf{x}_k$  for better readability.

We will first make an easy observation that contraction and bounded 2nd-moment of the invariant distribution lead to bounded 2nd-moment of the SDE solution for all time: let  $\mathbf{y}_0$  be a random variable following the invariant distribution of Eq. (1), i.e.,  $\mathbf{y}_0 \sim \mu$ , then  $\mathbf{y}_t \sim \mu$  and

$$\begin{aligned} \mathbb{E} \|\mathbf{x}_t\|^2 &\leq 2\mathbb{E} \|\mathbf{x}_t - \mathbf{y}_t\|^2 + 2\mathbb{E} \|\mathbf{y}_t\|^2 \\ &\leq 2\mathbb{E} \|\mathbf{x}_0 - \mathbf{y}_0\|^2 \exp(-2\beta t) + 2\mathbb{E} \|\mathbf{y}_t\|^2 \\ &\leq 4\mathbb{E}(\|\mathbf{x}_0\|^2 + \|\mathbf{y}_0\|^2) \exp(-2\beta t) + 2\mathbb{E} \|\mathbf{y}_t\|^2 \\ &= 4\mathbb{E} \|\mathbf{x}_0\|^2 \exp(-2\beta t) + (2 + 4\exp(-2\beta t)) \mathbb{E}_{\mathbf{y} \sim \mu} \|\mathbf{y}\|^2 \\ &\leq 4\mathbb{E} \|\mathbf{x}_0\|^2 + 6 \int_{\mathbb{R}^d} \|\mathbf{y}\|^2 d\mu \triangleq U^2 \end{aligned}$$

and then it follows that

$$\mathbb{E} \|\bar{\mathbf{x}}_k\|^2 \leq 2\mathbb{E} \|\bar{\mathbf{x}}_k - \mathbf{x}_k\|^2 + 2\mathbb{E} \|\mathbf{x}_k\|^2 \leq 2e_k^2 + 2U^2. \quad (13)$$

Denote  $\langle \mathbf{x}, \mathbf{y} \rangle_A = \langle A\mathbf{x}, A\mathbf{y} \rangle$ ,  $\|\mathbf{x}\|_A = \|A\mathbf{x}\|$  and

$$f_k = \left\{ \mathbb{E} \|\mathbf{x}_k - \bar{\mathbf{x}}_k\|_A^2 \right\}^{\frac{1}{2}} \quad (14)$$

where  $A$  is the non-singular matrix from Equation (4). Also denote that largest and smallest singular values of  $A$  by  $\sigma_{\max}$  and  $\sigma_{\min}$ , respectively, and the condition number of  $A$  by  $\kappa_A = \frac{\sigma_{\max}}{\sigma_{\min}}$ . Recall  $e_k = \mathbb{E} \|\mathbf{x}_k - \bar{\mathbf{x}}_k\|$ , it is easy to see that

$$\sigma_{\min} e_k \leq f_k \leq \sigma_{\max} e_k. \quad (15)$$

Further, we have the following decomposition

$$\begin{aligned} f_{k+1}^2 &= \mathbb{E} \|\mathbf{x}_{k+1} - \bar{\mathbf{x}}_{k+1}\|_A^2 \\ &= \mathbb{E} \left\| \mathbf{x}_{t_k, \mathbf{x}_{t_k}}(t_{k+1}) - \mathbf{x}_{t_k, \bar{\mathbf{x}}_k}(t_{k+1}) + \mathbf{x}_{t_k, \bar{\mathbf{x}}_k}(t_{k+1}) - \bar{\mathbf{x}}_{k+1} \right\|_A^2 \\ &= \underbrace{\mathbb{E} \left\| \mathbf{x}_{t_k, \mathbf{x}_{t_k}}(t_{k+1}) - \mathbf{x}_{t_k, \bar{\mathbf{x}}_k}(t_{k+1}) \right\|_A^2}_{\textcircled{1}} + \underbrace{\mathbb{E} \left\| \mathbf{x}_{t_k, \bar{\mathbf{x}}_k}(t_{k+1}) - \bar{\mathbf{x}}_{k+1} \right\|_A^2}_{\textcircled{2}} \\ &\quad + 2 \underbrace{\mathbb{E} \langle A(\mathbf{x}_{t_k, \mathbf{x}_{t_k}}(t_{k+1}) - \mathbf{x}_{t_k, \bar{\mathbf{x}}_k}(t_{k+1})), A(\mathbf{x}_{t_k, \bar{\mathbf{x}}_k}(t_{k+1}) - \bar{\mathbf{x}}_{k+1}) \rangle}_{\textcircled{3}}. \end{aligned} \quad (16)$$

Term  $\textcircled{1}$  is taken care of the contraction property

$$\mathbb{E} \left\| \mathbf{x}_{t_k, \mathbf{x}_{t_k}}(t_{k+1}) - \mathbf{x}_{t_k, \bar{\mathbf{x}}_k}(t_{k+1}) \right\|_A^2 \leq f_k^2 \exp(-2\beta h). \quad (17)$$

Term  $\textcircled{2}$  is dealt with by the bound on local strong error

$$\mathbb{E} \left\| \mathbf{x}_{t_k, \bar{\mathbf{x}}_k}(t_{k+1}) - \bar{\mathbf{x}}_{k+1} \right\|_A^2 \leq \sigma_{\max}^2 \left( C_2^2 + D_2^2 \mathbb{E} \|\bar{\mathbf{x}}_k\|^2 \right) h^{2p_2}. \quad (18)$$

Term (3) requires more efforts to cope with, and by the decomposition in Eq. (5) we have

$$\begin{aligned}
& \mathbb{E} \langle (\mathbf{x}_{t_k, \bar{\mathbf{x}}_k}(t_{k+1}) - \mathbf{x}_{t_k, \bar{\mathbf{x}}_k}(t_k), \mathbf{x}_{t_k, \bar{\mathbf{x}}_k}(t_{k+1}) - \bar{\mathbf{x}}_{k+1}) \rangle_A \\
&= \mathbb{E} \langle \mathbf{x}_k - \bar{\mathbf{x}}_k, \mathbf{x}_{t_k, \bar{\mathbf{x}}_k}(t_{k+1}) - \bar{\mathbf{x}}_{k+1} \rangle_A + \mathbb{E} \langle \mathbf{z}_h(\mathbf{x}_k, \bar{\mathbf{x}}_k), \mathbf{x}_{t_k, \bar{\mathbf{x}}_k}(t_{k+1}) - \bar{\mathbf{x}}_{k+1} \rangle_A \\
&\stackrel{(i)}{=} \mathbb{E} \langle \mathbf{x}_k - \bar{\mathbf{x}}_k, \mathbb{E}[\mathbf{x}_{t_k, \bar{\mathbf{x}}_k}(t_{k+1}) - \bar{\mathbf{x}}_{k+1} | \mathcal{F}_k] \rangle_A + \mathbb{E} \langle \mathbf{z}_h(\mathbf{x}_k, \bar{\mathbf{x}}_k), \mathbf{x}_{t_k, \bar{\mathbf{x}}_k}(t_{k+1}) - \bar{\mathbf{x}}_{k+1} \rangle_A \\
&\stackrel{(ii)}{\leq} f_k \left( \mathbb{E} \|\mathbb{E}[\mathbf{x}_{t_k, \bar{\mathbf{x}}_k}(t_{k+1}) - \bar{\mathbf{x}}_{k+1} | \mathcal{F}_k]\|_A^2 \right)^{\frac{1}{2}} + \left( \mathbb{E} \|\mathbf{z}_h(\mathbf{x}_k, \bar{\mathbf{x}}_k)\|_A^2 \right)^{\frac{1}{2}} \left( \mathbb{E} \|\mathbf{x}_{t_k, \bar{\mathbf{x}}_k}(t_{k+1}) - \bar{\mathbf{x}}_{k+1}\|_A^2 \right)^{\frac{1}{2}} \\
&\stackrel{(iii)}{\leq} \sigma_{\max} f_k \left( \mathbb{E} \|\mathbb{E}[\mathbf{x}_{t_k, \bar{\mathbf{x}}_k}(t_{k+1}) - \bar{\mathbf{x}}_{k+1} | \mathcal{F}_k]\|^2 \right)^{\frac{1}{2}} + \sigma_{\max}^2 \left( \mathbb{E} \|\mathbf{z}_h(\mathbf{x}_k, \bar{\mathbf{x}}_k)\|^2 \right)^{\frac{1}{2}} \left( \mathbb{E} \|\mathbf{x}_{t_k, \bar{\mathbf{x}}_k}(t_{k+1}) - \bar{\mathbf{x}}_{k+1}\|^2 \right)^{\frac{1}{2}} \\
&\stackrel{(iv)}{\leq} \sigma_{\max} f_k \left( C_1 + D_1 \sqrt{\mathbb{E} \|\bar{\mathbf{x}}_k\|^2} \right) h^{p_1} + \kappa_A \sigma_{\max} C_0 f_k \sqrt{h} \left( C_2 + D_2 \sqrt{\mathbb{E} \|\bar{\mathbf{x}}_k\|^2} \right) h^{p_2} \\
&\stackrel{(v)}{\leq} \kappa_A \sigma_{\max} (C_1 + C_0 C_2) e_k h^{p_2 + \frac{1}{2}} + \kappa_A \sigma_{\max} (D_1 + C_0 D_2) \sqrt{\mathbb{E} \|\bar{\mathbf{x}}_k\|^2} f_k h^{p_2 + \frac{1}{2}} \tag{19}
\end{aligned}$$

where (i) uses the tower property of conditional expectation and  $\mathcal{F}_k$  is the filtration at  $k$ -th iteration, (ii) uses Cauchy-Schwarz inequality, (iii) is due to the relationship between  $e_k$  and  $f_k$ , (iv) is due to local weak error, local strong error and Eq. (5), and (v) is due to  $p_1 \geq p_2 + \frac{1}{2}$  and  $0 < h \leq h_0 \leq 1$ .

Now plug Eq. (17), (18) and (19) in Eq. (16), we obtain

$$\begin{aligned}
f_{k+1}^2 &\leq f_k^2 \exp(-2\beta h) + \sigma_{\max}^2 \left( C_2^2 + D_2^2 \mathbb{E} \|\bar{\mathbf{x}}_k\|^2 \right) h^{2p_2} + \kappa_A \sigma_{\max} (C_1 + C_0 C_2) f_k h^{p_2 + \frac{1}{2}} \\
&\quad + \kappa_A \sigma_{\max} (D_1 + C_0 D_2) \sqrt{\mathbb{E} \|\bar{\mathbf{x}}_k\|^2} f_k h^{p_2 + \frac{1}{2}} \\
&\stackrel{(i)}{\leq} \left( 1 - \frac{7}{8} \beta h \right) f_k^2 + \sigma_{\max}^2 \left( C_2^2 + D_2^2 \mathbb{E} \|\bar{\mathbf{x}}_k\|^2 \right) h^{2p_2} + \kappa_A \sigma_{\max} (C_1 + C_0 C_2) f_k h^{p_2 + \frac{1}{2}} \\
&\quad + \kappa_A \sigma_{\max} (D_1 + C_0 D_2) \sqrt{\mathbb{E} \|\bar{\mathbf{x}}_k\|^2} f_k h^{p_2 + \frac{1}{2}} \\
&\stackrel{(ii)}{\leq} \left( 1 - \frac{7}{8} \beta h \right) f_k^2 + \kappa_A \sigma_{\max} \left( C_1 + C_0 C_2 + \sqrt{2} U (D_1 + C_0 D_2) \right) f_k h^{p_2 + \frac{1}{2}} + 2\kappa_A^2 D_2^2 f_k^2 h^{2p_2} \\
&\quad + \sqrt{2} \kappa_A^2 (D_1 + C_0 D_2) f_k^2 h^{p_2 + \frac{1}{2}} + \sigma_{\max}^2 \left( C_2^2 + 2D_2^2 U^2 \right) h^{2p_2} \\
&\stackrel{(iii)}{\leq} \left( 1 - \frac{7}{8} \beta h \right) f_k^2 + \kappa_A \sigma_{\max} \left( C_1 + C_0 C_2 + \sqrt{2} U (D_1 + C_0 D_2) \right) f_k h^{p_2 + \frac{1}{2}} + \frac{3\beta}{8} f_k^2 h \\
&\quad + \sigma_{\max}^2 \left( C_2^2 + 2D_2^2 U^2 \right) h^{2p_2} \\
&= \left( 1 - \frac{1}{2} \beta h \right) f_k^2 + \kappa_A \sigma_{\max} \left( C_1 + C_0 C_2 + \sqrt{2} U (D_1 + C_0 D_2) \right) f_k h^{p_2 + \frac{1}{2}} \\
&\quad + \sigma_{\max}^2 \left( C_2^2 + 2D_2^2 U^2 \right) h^{2p_2} \\
&\stackrel{(iv)}{\leq} \left( 1 - \frac{1}{2} \beta h \right) f_k^2 + \frac{\beta}{4} f_k^2 h + \frac{\kappa_A^2 \sigma_{\max}^2 \left( C_1 + C_0 C_2 + \sqrt{2} U (D_1 + C_0 D_2) \right)^2}{\beta} h^{2p_2} \\
&\quad + \sigma_{\max}^2 \left( C_2^2 + 2D_2^2 U^2 \right) h^{2p_2} \\
&= \left( 1 - \frac{1}{4} \beta h \right) f_k^2 + \kappa_A^2 \sigma_{\max}^2 \left( \frac{\left( C_1 + C_0 C_2 + \sqrt{2} U (D_1 + C_0 D_2) \right)^2}{\beta} + C_2^2 + 2D_2^2 U^2 \right) h^{2p_2}
\end{aligned}$$

where (i) is due to the assumption  $0 < h \leq \frac{1}{4\beta}$  and  $e^{-x} \leq 1 - x + \frac{x^2}{2}$  for  $0 < x < 1$ , (ii) is due to the upper bound on  $\mathbb{E} \|\bar{\mathbf{x}}_k\|^2$  in Eq. (13), (iii) holds provided when  $h \leq$

$\min \left\{ \left( \frac{\sqrt{\beta}}{4\sqrt{2}\kappa_A D_2} \right)^{\frac{1}{p_2 - \frac{1}{2}}}, \left( \frac{\beta}{8\sqrt{2}\kappa_A^2 (D_1 + C_0 D_2)} \right)^{\frac{1}{p_2 - \frac{1}{2}}} \right\}$  and (iv) is due to Cauchy-Schwarz inequality.

Unfolding the above inequality gives us

$$f_{k+1}^2 \leq \frac{4}{\beta} \kappa_A^2 \sigma_{\max}^2 \left( \frac{(C_1 + C_0 C_2 + \sqrt{2}U(D_1 + C_0 D_2))^2}{\beta} + C_2^2 + 2D_2^2 U^2 \right) h^{2p_2 - 1}.$$

Taking square root on both sides and using  $\sqrt{a^2 + b^2 + c^2} \leq a + b + c, \forall a, b, c \geq 0$  yields

$$f_{k+1} \leq \frac{2}{\sqrt{\beta}} \kappa_A \sigma_{\max} \left( \frac{C_1 + C_0 C_2 + \sqrt{2}U(D_1 + C_0 D_2)}{\sqrt{\beta}} + C_2 + \sqrt{2}D_2 U \right) h^{p_2 - \frac{1}{2}}.$$

Finally using the relationship between  $e_k$  and  $f_k$ , we obtain

$$e_k \leq \frac{2}{\sqrt{\beta}} \kappa_A^2 \left( \frac{C_1 + C_0 C_2 + \sqrt{2}U(D_1 + C_0 D_2)}{\sqrt{\beta}} + C_2 + \sqrt{2}D_2 U \right) h^{p_2 - \frac{1}{2}}.$$

□

#### A.2 PROOF OF THEOREM 3.4 (NON-ASYMPTOTIC SAMPLING ERROR BOUND: GENERAL CASE)

*Proof.* Let  $\mathbf{y}_0 \sim \mu$  and  $(\mathbf{x}_0, \mathbf{y}_0)$  are coupled such that  $\mathbb{E} \|\mathbf{x}_0 - \mathbf{y}_0\|^2 = W_2^2(\text{Law}(\mathbf{x}_0), \mu)$ . Denote the solution of Eq. (1) starting from  $\mathbf{x}_0, \mathbf{y}_0$  by  $\mathbf{x}_t, \mathbf{y}_t$  respectively, and  $t_k = kh$ . We have

$$\begin{aligned} W_2(\text{Law}(\bar{\mathbf{x}}_k), \mu) &\leq W_2(\text{Law}(\bar{\mathbf{x}}_k), \text{Law}(\mathbf{x}_{t_k})) + W_2(\text{Law}(\mathbf{x}_{t_k}), \mu) \\ &\leq \sqrt{\mathbb{E} \|\bar{\mathbf{x}}_k - \mathbf{x}_{t_k}\|^2} + \sqrt{\mathbb{E} \|\mathbf{x}_{t_k} - \mathbf{y}_{t_k}\|^2} \\ &\stackrel{(i)}{\leq} e_k + \sqrt{\mathbb{E} \|\mathbf{x}_0 - \mathbf{y}_0\|^2 \exp(-2\beta t_k)} \\ &= e_k + \exp(-\beta t_k) W_2(\text{Law}(\mathbf{x}_0), \mu) \end{aligned}$$

where (i) is due to the contraction assumption on Eq. (1). Invoking the conclusion of Theorem 3.3 completes the proof. □

#### A.3 PROOF OF COROLLARY 3.5 (UPPER BOUND OF MIXING TIME: GENERAL CASE)

*Proof.* Given any tolerance  $\epsilon > 0$ , we know from Theorem 3.4 that if  $k$  is large enough and  $h$  is small enough such that

$$\exp(-\beta kh) W_2(\text{Law}(\mathbf{x}_0), \mu) \leq \frac{\epsilon}{2}. \quad (20)$$

$$Ch^{p_2 - \frac{1}{2}} \leq \frac{\epsilon}{2} \quad (21)$$

we then have  $W_2(\text{Law}(\bar{\mathbf{x}}_k), \mu) \leq \epsilon$ . Solving Inequality (20) yields

$$k \geq \frac{1}{\beta h} \log \frac{2W_2(\text{Law}(\mathbf{x}_0), \mu)}{\epsilon} \triangleq k^* \quad (22)$$

To minimize the lower bound, we want pick step size  $h$  as large as possible. Besides  $h \leq h_1$ , Eq. (21) poses further constraint on  $h$ , hence we have

$$h \leq \min \left\{ h_1, \left( \frac{\epsilon}{2C} \right)^{\frac{1}{p_2 - \frac{1}{2}}} \right\}.$$

Plug the upper bound of  $h$  in Eq. (22), we have

$$k^* = \max \left\{ \frac{1}{\beta h_1}, \frac{1}{\beta} \left( \frac{2C}{\epsilon} \right)^{\frac{1}{p_2 - \frac{1}{2}}} \right\} \log \frac{2W_2(\text{Law}(\mathbf{x}_0), \mu)}{\epsilon}.$$

When high accuracy is needed, i.e.,  $\epsilon < 2Ch_1^{p_2 - \frac{1}{2}}$ , we have

$$k^* = \frac{(2C)^{\frac{1}{p_2 - \frac{1}{2}}}}{\beta} \frac{1}{\epsilon^{\frac{1}{p_2 - \frac{1}{2}}}} \log \frac{2W_2(\text{Law}(\mathbf{x}_0), \mu)}{\epsilon} = \tilde{\mathcal{O}} \left( \frac{C^{\frac{1}{p_2 - \frac{1}{2}}}}{\beta} \frac{1}{\epsilon^{\frac{1}{p_2 - \frac{1}{2}}}} \right).$$

□

## B PROOF OF RESULTS IN SECTION 4

### B.1 PROOF OF THEOREM 4.1 (NON-ASYMPTOTIC ERROR BOUND: LMC)

*Proof.* From Lemma C.1 we know that Langevin dynamics is a member of the family of contractive SDE, and with a contraction rate of strong-convexity coefficient  $\beta = m$  (w.r.t. identity matrix  $I_{d \times d}$ ).

Next, we will need to work out the constants  $C_0, C_1, D_1, D_2, C_2$  needed in Theorem 3.3. We have  $C_0 = \frac{\sqrt{m}}{2}$ , implied from Lemma C.3.

The local strong error and local weak error are bounded in Lemma D.1 and D.2 respectively. Note that the coefficient  $\tilde{C}_1/\tilde{C}_2$  in the bound for local strong/weak error depends on initial value, which changes from iteration to iteration. Combined with Lemma D.3, we would obtain  $C_1$  and  $C_2$ , namely

$$\tilde{C}_1 \leq 2(L^2 + G) \left( \frac{d}{4\kappa L} + \mathbb{E} \|\mathbf{x}_0\|^2 + \frac{8d}{7m} + 1 \right)^{\frac{1}{2}} \leq 2(L^2 + G) \sqrt{\frac{2d}{m} + \mathbb{E} \|\mathbf{x}_0\|^2 + 1} \triangleq C_1$$

and

$$\tilde{C}_2 \leq 2L \left( d + \frac{m}{2} \left( \mathbb{E} \|\mathbf{x}_0\|^2 + \frac{8d}{7m} \right) \right)^{\frac{1}{2}} \leq 2L\sqrt{m} \sqrt{\frac{2d}{m} + \mathbb{E} \|\mathbf{x}_0\|^2 + 1} \triangleq C_2.$$

We collect all constants here in the proof for easier reference

$$\begin{aligned} A &= I_{d \times d}, \kappa_A = 1, \beta = m, h_0 = \frac{1}{4\kappa L}, C_0 = \frac{\sqrt{m}}{2}, \\ C_1 &= 2(L^2 + G) \sqrt{\frac{2d}{m} + \mathbb{E} \|\mathbf{x}_0\|^2 + 1}, D_1 = 0 \\ C_2 &= 2L\sqrt{m} \sqrt{\frac{2d}{m} + \mathbb{E} \|\mathbf{x}_0\|^2 + 1}, D_2 = 0. \end{aligned}$$

Then the constant in Theorem 3.3 for LMC algorithm simplifies to

$$\begin{aligned} C &= \frac{2}{\sqrt{\beta}} \left( \frac{C_1 + C_0 C_2}{\sqrt{\beta}} + C_2 \right), \\ &\leq \frac{10(L^2 + G)}{m^{\frac{3}{2}}} \sqrt{2d + m \left( \mathbb{E} \|\mathbf{x}_0\|^2 + 1 \right)} \triangleq C_{\text{LMC}}. \end{aligned}$$

Assuming  $L, m, G$  are all constants and independent of  $d$ , then clearly  $C_{\text{LMC}} = \mathcal{O}(\sqrt{d})$ . Then applying Theorem 3.4 to LMC, we have

$$W_2(\text{Law}(\bar{\mathbf{x}}_k), \mu) \leq e^{-m\kappa h} W_2(\text{Law}(\mathbf{x}_0), \mu) + C_{\text{LMC}} h \quad (23)$$

for  $0 < h \leq \frac{1}{4\kappa L}$ . □

## B.2 PROOF OF THEOREM 4.3 (LOWER BOUND OF MIXING TIME)

*Proof.* If we start from  $\mathbf{x}_0 = \mathbf{1}_{2d}$  and run LMC for the potential function in Eq. (11), we then have

$$(\bar{\mathbf{x}}_k)_i = \begin{cases} (1 - mh)^k (\mathbf{x}_0)_i + \sqrt{2h} \sum_{l=1}^k (1 - mh)^{k-l} (\boldsymbol{\xi}_l)_i, & 1 \leq i \leq d \\ (1 - Lh)^k (\mathbf{x}_0)_i + \sqrt{2h} \sum_{l=1}^k (1 - Lh)^{k-l} (\boldsymbol{\xi}_l)_i, & d+1 \leq i \leq 2d \end{cases}$$

and hence

$$(\bar{\mathbf{x}}_k)_i \sim \begin{cases} \mathcal{N}\left((1 - mh)^k, \frac{2}{m(2-mh)} (1 - (1 - mh)^{2k})\right), & 1 \leq i \leq d \\ \mathcal{N}\left((1 - Lh)^k, \frac{2}{L(2-Lh)} (1 - (1 - Lh)^{2k})\right), & d+1 \leq i \leq 2d \end{cases}$$

Clearly, stability requires  $h < \frac{2}{L}$ .

The squared 2-Wasserstein distance between the law of the  $k$ -th iterate of LMC and target distribution is

$$\begin{aligned} W_2^2(\text{Law}(\bar{\mathbf{x}}_k), \mu) &= d(1 - mh)^{2k} + \frac{d}{m} \left( \sqrt{\frac{2}{2-mh}} \sqrt{1 - (1 - mh)^{2k}} - 1 \right)^2 \\ &\quad + d(1 - Lh)^{2k} + \frac{d}{L} \left( \sqrt{\frac{2}{2-Lh}} \sqrt{1 - (1 - Lh)^{2k}} - 1 \right)^2. \end{aligned}$$

Suppose  $W_2(\text{Law}(\bar{\mathbf{x}}_k), \mu) \leq \epsilon$ , we then must have

$$d(1 - mh)^{2k} \leq \epsilon^2 \tag{24}$$

$$\frac{d}{m} \left( \sqrt{\frac{2}{2-mh}} \sqrt{1 - (1 - mh)^{2k}} - 1 \right)^2 \leq \epsilon^2. \tag{25}$$

A necessary condition of Eq. (25) is that

$$1 + \frac{\sqrt{m}}{\sqrt{d}} \epsilon \geq \sqrt{\frac{2}{2-mh}} \sqrt{1 - (1 - mh)^{2k}} \stackrel{(i)}{\geq} \sqrt{\frac{2}{2-mh}} \sqrt{1 - \frac{\epsilon^2}{d}} \tag{26}$$

where (i) is due to Eq. (24). It follows from Eq. (26) and  $m = 1$  that

$$h \leq \frac{4}{1 + \frac{\epsilon}{\sqrt{d}}} \frac{\epsilon}{\sqrt{d}} \leq \frac{4\epsilon}{\sqrt{d}}. \tag{27}$$

Revisiting Eq. (24) yields

$$\begin{aligned} \epsilon^2 &\geq d(1 - mh)^{2k} \stackrel{(i)}{\geq} d \left( 1 - 2mh + \frac{(2mh)^2}{2} \right)^{2k} \stackrel{(ii)}{\geq} de^{-4mkh} \\ \iff k &\geq \frac{1}{2hm} \log \frac{\sqrt{d}}{\epsilon} \end{aligned} \tag{28}$$

where (i) is due to  $mh < \frac{2}{\kappa} < \frac{1}{2}$  and (ii) is due to  $e^{-x} \leq 1 - x + \frac{x^2}{2}, 0 < x < 1$ .

Combine Eq. (27) and (28), we then obtain a lower bound of the mixing time

$$k \geq \frac{\sqrt{d}}{8m\epsilon} \log \frac{\sqrt{d}}{\epsilon} = \frac{\sqrt{d}}{8\epsilon} \log \frac{\sqrt{d}}{\epsilon} = \tilde{\Omega} \left( \frac{\sqrt{d}}{\epsilon} \right).$$

□

## C SOME PROPERTIES OF LANGEVIN DYNAMICS

### C.1 CONTRACTION OF LANGEVIN DYNAMICS

**Lemma C.1.** *Suppose Assumption 1 holds. Then two copies of overdamped Langevin dynamics have the following contraction property*

$$\left\{ \mathbb{E} \|\mathbf{y}_t - \mathbf{x}_t\|^2 \right\}^{\frac{1}{2}} \leq \left\{ \mathbb{E} \|\mathbf{y} - \mathbf{x}\|^2 \right\}^{\frac{1}{2}} \exp(-mt)$$

where  $\mathbf{x}, \mathbf{y}$  are the initial values of  $\mathbf{x}_t, \mathbf{y}_t$ .

*Proof.* First assume  $\mathbf{x}, \mathbf{y}$  are deterministic. Suppose  $\mathbf{x}_t, \mathbf{y}_t$  are respectively the solutions to

$$\begin{aligned} d\mathbf{x}_t &= -\nabla f(\mathbf{x}_t)dt + \sqrt{2}d\mathbf{B}_t \\ d\mathbf{y}_t &= -\nabla f(\mathbf{y}_t)dt + \sqrt{2}d\mathbf{B}_t \end{aligned}$$

where  $\mathbf{B}_t$  is a standard  $d$ -dimensional Brownian motion. Denote  $L_t = \frac{1}{2}\mathbb{E} \|\mathbf{y}_t - \mathbf{x}_t\|^2$  and take time derivative, we obtain

$$\frac{d}{dt}L_t = -\mathbb{E} \langle \mathbf{y}_t - \mathbf{x}_t, \nabla f(\mathbf{y}_t) - \nabla f(\mathbf{x}_t) \rangle \stackrel{(i)}{\leq} -m\mathbb{E} \|\mathbf{y}_t - \mathbf{x}_t\|^2 = -2mL_t$$

where (i) is due to the strong-convexity assumption made on  $f$ . We then obtain  $L_t \leq L_0 \exp(-2mt)$  and it follows by Gronwall's inequality that

$$\left\{ \mathbb{E} \|\mathbf{y}_t - \mathbf{x}_t\|^2 \right\}^{\frac{1}{2}} \leq \|\mathbf{y} - \mathbf{x}\| \exp(-mt).$$

When  $\mathbf{x}, \mathbf{y}$  are random, by the conditioning version of the above inequality and Jensen's inequality, we have

$$\left\{ \mathbb{E} \left[ \mathbb{E} \|\mathbf{y}_t - \mathbf{x}_t\|^2 \middle| \mathbf{x}, \mathbf{y} \right] \right\}^{\frac{1}{2}} \leq \left\{ \mathbb{E} \|\mathbf{y} - \mathbf{x}\|^2 \exp(-2mt) \right\}^{\frac{1}{2}} = \left\{ \mathbb{E} \|\mathbf{y} - \mathbf{x}\|^2 \right\}^{\frac{1}{2}} \exp(-mt).$$

□

### C.2 GROWTH BOUND OF LANGEVIN DYNAMICS

**Lemma C.2.** *Suppose Assumption 1 holds, then when  $0 \leq h \leq \frac{1}{4\kappa L}$ , the solution of overdamped Langevin dynamics  $\mathbf{x}_t$  satisfies*

$$\mathbb{E} \|\mathbf{x}_h - \mathbf{x}\|^2 \leq 6 \left( d + \frac{m}{2} \mathbb{E} \|\mathbf{x}\|^2 \right) h$$

where  $\mathbf{x}$  is the initial value at  $t = 0$ .

*Proof.* We have

$$\begin{aligned}
\mathbb{E} \|\mathbf{x}_h - \mathbf{x}\|^2 &= \mathbb{E} \left\| -\int_0^h \nabla f(\mathbf{x}_t) dt + \sqrt{2} \int_0^h d\mathbf{B}_t \right\|^2 \\
&\leq 2\mathbb{E} \left\| \int_0^h \nabla f(\mathbf{x}_t) dt \right\|^2 + 4\mathbb{E} \left\| \int_0^h d\mathbf{B}_t \right\|^2 \\
&\stackrel{(i)}{=} 2\mathbb{E} \left\| \int_0^h \nabla f(\mathbf{x}_t) dt \right\|^2 + 4hd \\
&\leq 2\mathbb{E} \left[ \left( \int_0^h \|\nabla f(\mathbf{x}_t) - \nabla f(\mathbf{x})\| dt + \int_0^h \|\nabla f(\mathbf{x})\| dt \right)^2 \right] + 4hd \\
&\leq 2\mathbb{E} \left[ \left( L \int_0^h \|\mathbf{x}_t - \mathbf{x}\| dt + h \|\nabla f(\mathbf{x})\| \right)^2 \right] + 4hd \\
&\leq 4\mathbb{E} \left[ L^2 \left( \int_0^h \|\mathbf{x}_t - \mathbf{x}\| dt \right)^2 + h^2 \|\nabla f(\mathbf{x})\|^2 \right] + 4hd \\
&\stackrel{(ii)}{\leq} 4hd + 4h^2 \mathbb{E} \|\nabla f(\mathbf{x})\|^2 + 4L^2 h \int_0^h \mathbb{E} \|\mathbf{x}_t - \mathbf{x}\|^2 dt
\end{aligned}$$

where (i) is due to Ito's isometry, (ii) is due to Cauchy-Schwarz inequality. By Gronwall's inequality, we obtain

$$\mathbb{E} \|\mathbf{x}_h - \mathbf{x}\|^2 \leq 4h \left( d + h \mathbb{E} \|\nabla f(\mathbf{x})\|^2 \right) \exp \left\{ 4L^2 h^2 \right\}.$$

Since  $\|\nabla f(\mathbf{x})\| = \|\nabla f(\mathbf{x}) - \nabla f(\mathbf{0})\| \leq L \|\mathbf{x}\|$ , when  $0 < h \leq \frac{1}{4\kappa L}$ , we finally reach at

$$\mathbb{E} \|\mathbf{x}_h - \mathbf{x}\|^2 \leq 4e^{\frac{1}{4}} \left( d + 2hL^2 \mathbb{E} \|\mathbf{x}\|^2 \right) h \leq 6 \left( d + \frac{m}{2} \mathbb{E} \|\mathbf{x}\|^2 \right) h.$$

□

### C.3 BOUND ON EVOLVED DEVIATION

**Lemma C.3.** Suppose Assumption 1 holds. Let  $\mathbf{x}_t, \mathbf{y}_t$  be two solutions of overdamped Langevin dynamics starting from  $\mathbf{x}, \mathbf{y}$  respectively, for  $0 < h \leq \frac{1}{4\kappa L}$ , we have the following representation

$$\mathbf{x}_h - \mathbf{y}_h = \mathbf{x} - \mathbf{y} + \mathbf{z}$$

with

$$\mathbb{E} \|\mathbf{z}\|^2 \leq \frac{m}{4} \mathbb{E} \|\mathbf{x} - \mathbf{y}\|^2 h.$$

*Proof.* Let  $\mathbf{z} = (\mathbf{x}_h - \mathbf{y}_h) - (\mathbf{x} - \mathbf{y}) = -\int_0^h \nabla f(\mathbf{x}_s) - \nabla f(\mathbf{y}_s) ds$ . Ito's lemma readily implies that

$$\begin{aligned}
\mathbb{E} \|\mathbf{x}_h - \mathbf{y}_h\|^2 &= \mathbb{E} \|\mathbf{x} - \mathbf{y}\|^2 - 2\mathbb{E} \int_0^h \langle \mathbf{x}_s - \mathbf{y}_s, \nabla f(\mathbf{x}_s) - \nabla f(\mathbf{y}_s) \rangle ds \\
&\stackrel{(i)}{\leq} \mathbb{E} \|\mathbf{x} - \mathbf{y}\|^2 - 2m \int_0^h \mathbb{E} \|\mathbf{x}_s - \mathbf{y}_s\|^2 ds \\
&\leq \mathbb{E} \|\mathbf{x} - \mathbf{y}\|^2
\end{aligned}$$

where (i) is due to strong-convexity of  $f$ . We then have that

$$\begin{aligned}
\mathbb{E} \|\mathbf{z}\|^2 &= \left\| \mathbb{E} \left[ \int_0^h \nabla f(\mathbf{x}_s) - \nabla f(\mathbf{y}_s) ds \right] \right\|^2 \\
&\leq \left( \int_0^h \left\| \mathbb{E} [\nabla f(\mathbf{x}_s) - \nabla f(\mathbf{y}_s)] \right\| ds \right)^2 \\
&\leq \int_0^h 1^2 ds \int_0^h \left\| \mathbb{E} [\nabla f(\mathbf{x}_s) - \nabla f(\mathbf{y}_s)] \right\|^2 ds \\
&\leq h \int_0^h \mathbb{E} \|\nabla f(\mathbf{x}_s) - \nabla f(\mathbf{y}_s)\|^2 ds \\
&\leq L^2 h \int_0^h \mathbb{E} \|\mathbf{x}_s - \mathbf{y}_s\|^2 ds \\
&\leq L^2 \mathbb{E} \|\mathbf{x} - \mathbf{y}\|^2 h^2 \\
&\stackrel{(i)}{\leq} \frac{m}{4} \mathbb{E} \|\mathbf{x} - \mathbf{y}\|^2 h
\end{aligned}$$

where (i) is due to  $h \leq \frac{1}{4\kappa L}$ . □

## D SOME PROPERTIES OF LMC ALGORITHM

### D.1 LOCAL STRONG ERROR

**Lemma D.1.** *Suppose Assumption 1 holds. Denote the one-step iteration of LMC algorithm with step size  $h$  by  $\bar{\mathbf{x}}_1$  and the solution of overdamped Langevin dynamics at time  $t = h$  by  $\mathbf{x}_h$ . Both the discrete algorithm and the continuous dynamics start from the same initial value  $\mathbf{x}$ . If  $0 \leq h \leq \frac{1}{4\kappa L}$ , then the local strong error of LMC algorithm satisfies*

$$\left\{ \mathbb{E} \|\bar{\mathbf{x}}_1 - \mathbf{x}_h\|^2 \right\}^{\frac{1}{2}} \leq \tilde{C}_2 h^{\frac{3}{2}}$$

with  $\tilde{C}_2 = 2L \left( d + \frac{m}{2} \mathbb{E} \|\mathbf{x}\|^2 \right)^{\frac{1}{2}}$ .

*Proof.* We have for  $0 \leq h \leq \frac{1}{4\kappa L}$ ,

$$\begin{aligned}
\mathbb{E} \|\bar{\mathbf{x}}_1 - \mathbf{x}_h\|^2 &= \mathbb{E} \left\| \int_0^h \nabla f(\mathbf{x}_s) - \nabla f(\mathbf{x}) ds \right\|^2 \\
&\leq \mathbb{E} \left( \int_0^h \|\nabla f(\mathbf{x}_s) - \nabla f(\mathbf{x})\| ds \right)^2 \\
&\leq L^2 \mathbb{E} \left( \int_0^h \|\mathbf{x}_s - \mathbf{x}\| ds \right)^2 \\
&\stackrel{(i)}{\leq} L^2 h \int_0^h \mathbb{E} \|\mathbf{x}_s - \mathbf{x}\|^2 ds \\
&\stackrel{(ii)}{\leq} 3L^2 \left( d + \frac{m}{2} \mathbb{E} \|\mathbf{x}\|^2 \right) h^3
\end{aligned}$$

where (i) is due to Cauchy-Schwartz inequality and (ii) is due to Lemma C.2. Taking square roots on both side completes the proof. □



## D.2 LOCAL WEAK ERROR

**Lemma D.2.** *Suppose Assumption 1 and 2 hold. Denote the one-step iteration of LMC algorithm with step size  $h$  by  $\bar{\mathbf{x}}_1$  and the solution of overdamped Langevin dynamics at time  $t = h$  by  $\mathbf{x}_h$ . Both the discrete algorithm and the continuous dynamics start from the same initial value  $\mathbf{x}$ . If  $0 \leq h \leq \frac{1}{4\kappa L}$ , then the local weak error of LMC algorithm satisfies*

$$\|\mathbb{E}\bar{\mathbf{x}}_1 - \mathbb{E}\mathbf{x}_h\| \leq \tilde{C}_1 h^2$$

with  $\tilde{C}_1 = 2(L^2 + G) \left( \frac{d}{4\kappa L} + \mathbb{E}\|\mathbf{x}\|^2 + 1 \right)^{\frac{1}{2}}$ .

*Proof.* By Ito's lemma, we have

$$d\nabla f(\mathbf{x}_t) = -\nabla^2 f(\mathbf{x}_t) \nabla f(\mathbf{x}_t) dt + \nabla(\Delta f(\mathbf{x}_t)) dt + \sqrt{2} \int_0^t \nabla^2 f(\mathbf{x}_t) d\mathbf{B}_t.$$

It follows that

$$\begin{aligned} \|\mathbb{E}\bar{\mathbf{x}}_1 - \mathbb{E}\mathbf{x}_h\| &= \left\| \mathbb{E} \int_0^h \nabla f(\mathbf{x}_s) - \nabla f(\mathbf{x}) ds \right\| \\ &= \left\| \mathbb{E} \left\{ \int_0^h \int_0^s -\nabla^2 f(\mathbf{x}_r) \nabla f(\mathbf{x}_r) + \nabla(\Delta f(\mathbf{x}_r)) dr ds + \sqrt{2} \int_0^h \int_0^s \nabla^2 f(\mathbf{x}_r) d\mathbf{B}_r ds \right\} \right\| \\ &= \left\| \mathbb{E} \left\{ \int_0^h \int_0^s -\nabla^2 f(\mathbf{x}_r) \nabla f(\mathbf{x}_r) + \nabla(\Delta f(\mathbf{x}_r)) dr ds \right\} \right\| \\ &\leq \int_0^h \int_0^s \mathbb{E} \left\| \nabla^2 f(\mathbf{x}_r) \nabla f(\mathbf{x}_r) \right\| dr ds + \int_0^h \int_0^s \mathbb{E} \left\| \nabla(\Delta f(\mathbf{x}_r)) \right\| dr ds \\ &\leq L \int_0^h \int_0^s \mathbb{E} \left\| \nabla f(\mathbf{x}_r) \right\| dr ds + \int_0^h \int_0^s \mathbb{E} \left\| \nabla(\Delta f(\mathbf{x}_r)) \right\| dr ds \\ &\stackrel{(i)}{\leq} (L^2 + G) \int_0^h \int_0^s \mathbb{E} \|\mathbf{x}_r\| dr ds + \frac{G}{2} h^2 \\ &\leq (L^2 + G) \left( \int_0^h \int_0^s \mathbb{E} \|\mathbf{x}_r - \mathbf{x}\| dr ds + \frac{h^2}{2} \mathbb{E} \|\mathbf{x}\| \right) + \frac{G}{2} h^2 \\ &\stackrel{(ii)}{\leq} (L^2 + G) \left( \int_0^h \int_0^s \sqrt{\mathbb{E} \|\mathbf{x}_r - \mathbf{x}\|^2} dr ds + \frac{h^2}{2} \mathbb{E} \|\mathbf{x}\| \right) + \frac{G}{2} h^2 \\ &\stackrel{(iii)}{\leq} (L^2 + G) \left( \int_0^h \int_0^s \sqrt{6 \left( d + \frac{m}{2} \mathbb{E} \|\mathbf{x}\|^2 \right) r} dr ds + \frac{h^2}{2} \mathbb{E} \|\mathbf{x}\| \right) + \frac{G}{2} h^2 \\ &= (L^2 + G) \left( \frac{4\sqrt{6}}{15} \sqrt{\left( d + \frac{m}{2} \mathbb{E} \|\mathbf{x}\|^2 \right) h} + \frac{1}{2} \mathbb{E} \|\mathbf{x}\| \right) h^2 + \frac{G}{2} h^2 \\ &\stackrel{(iv)}{\leq} (L^2 + G) h^2 \sqrt{\left( d + \frac{m}{2} \mathbb{E} \|\mathbf{x}\|^2 \right) h} + \frac{1}{2} \mathbb{E} \|\mathbf{x}\|^2 + \frac{G}{2} h^2 \\ &\stackrel{(v)}{\leq} (L^2 + G) h^2 \sqrt{\frac{d}{4\kappa L} + \mathbb{E} \|\mathbf{x}\|^2} + \frac{G}{2} h^2 \\ &\leq (L^2 + G) \left( \sqrt{\frac{d}{4\kappa L} + \mathbb{E} \|\mathbf{x}\|^2} + 1 \right) h^2 \\ &\leq 2(L^2 + G) \left( \frac{d}{4\kappa L} + \mathbb{E} \|\mathbf{x}\|^2 + 1 \right)^{\frac{1}{2}} h^2 \end{aligned}$$

where (i) is due to Assumption 2, (ii) is due to Jensen's inequality, (iii) is due to Lemma C.2, (iv) is due to  $\sqrt{a} + \sqrt{b} \leq \sqrt{2}\sqrt{a^2 + b^2}$  and (v) is due to  $h \leq \frac{1}{4\kappa L}$ . It is worth noting in the third equation that the Ito's correction term  $\nabla \Delta f$  can also be written as  $\Delta \nabla f$  as the two operators commute for  $\mathcal{C}^3$  functions.  $\square$

### D.3 BOUNDEDNESS OF LMC ALGORITHM

**Lemma D.3.** *Suppose Assumption 1 holds. Denote the iterates of LMC by  $\bar{\mathbf{x}}_k$ . If  $0 \leq h \leq \frac{1}{4\kappa L}$  we then have the iterates of LMC algorithm are uniformly upper bounded by*

$$\mathbb{E} \|\bar{\mathbf{x}}_k\|^2 \leq \mathbb{E} \|\mathbf{x}_0\|^2 + \frac{8d}{7m}, \quad \forall k \geq 0$$

*Proof.* We have

$$\begin{aligned} \mathbb{E} \|\bar{\mathbf{x}}_{k+1}\|^2 &= \mathbb{E} \left\| \bar{\mathbf{x}}_k - h\nabla f(\bar{\mathbf{x}}_k) + \sqrt{2h}\boldsymbol{\xi}_{k+1} \right\|^2 \\ &\stackrel{(i)}{=} \mathbb{E} \|\bar{\mathbf{x}}_k\|^2 + h^2 \mathbb{E} \|\nabla f(\bar{\mathbf{x}}_k)\|^2 + 2hd - 2h\mathbb{E} \langle \bar{\mathbf{x}}_k, \nabla f(\bar{\mathbf{x}}_k) \rangle \\ &= \mathbb{E} \|\bar{\mathbf{x}}_k\|^2 + h^2 \mathbb{E} \|\nabla f(\bar{\mathbf{x}}_k) - \nabla f(0)\|^2 + 2hd - 2h\mathbb{E} \langle \bar{\mathbf{x}}_k, \nabla f(\bar{\mathbf{x}}_k) \rangle \\ &\stackrel{(ii)}{\leq} \mathbb{E} \|\bar{\mathbf{x}}_k\|^2 + h^2 L^2 \mathbb{E} \|\bar{\mathbf{x}}_k\|^2 + 2hd - 2h\mathbb{E} \langle \bar{\mathbf{x}}_k, \nabla f(\bar{\mathbf{x}}_k) \rangle \\ &\stackrel{(iii)}{\leq} \mathbb{E} \|\bar{\mathbf{x}}_k\|^2 + h^2 L^2 \mathbb{E} \|\bar{\mathbf{x}}_k\|^2 + 2hd - 2mh\mathbb{E} \|\bar{\mathbf{x}}_k\|^2 \\ &\stackrel{(iv)}{\leq} \left(1 - \frac{7}{4}mh\right) \mathbb{E} \|\bar{\mathbf{x}}_k\|^2 + 2hd \end{aligned}$$

where (i) is due to the independence between  $\boldsymbol{\xi}_{k+1}$  and  $\bar{\mathbf{x}}_k$ , (ii) is due to Assumption 1, (iii) is due to the property of  $m$ -strongly-convex functions,  $\langle \nabla f(\mathbf{y}) - \nabla f(\mathbf{x}), \mathbf{y} - \mathbf{x} \rangle \geq m \|\mathbf{y} - \mathbf{x}\|^2 \forall \mathbf{x}, \mathbf{y} \in \mathbb{R}^d$ , and (iv) uses the assumption  $h \leq \frac{1}{4\kappa L}$ .

Unfolding the inequality, we obtain

$$\mathbb{E} \|\bar{\mathbf{x}}_k\|^2 \leq \left(1 - \frac{7}{4}mh\right)^k \mathbb{E} \|\bar{\mathbf{x}}_0\|^2 + 2hd \left(1 + \frac{7}{4}mh + \dots + \left(\frac{7}{4}mh\right)^{k-1}\right) \leq \mathbb{E} \|\mathbf{x}_0\|^2 + \frac{8d}{7m}$$

$\square$
